# Supplementary material for: Effective BPA degradation in water: the integration of bimetallic UiO-66 Ce–Zr
Source: Royal Society of Chemistry journal article supplement (doi:10.1039/d4ra06460g), 2024-01-01
Supplement: d4ra06460g1.pdf [file d4ra06460g1.pdf]

Supporting Information for:

**Effective BPA degradation from water: the integration of bimetallic UiO-66 Ce-Zr**

Leidy Marcela Gallo,<sup>a</sup> Juan L. Obeso,<sup>a,b</sup> Nora S. Portillo-Vélez,<sup>c</sup> Carlos E. Garduño-

Albino,<sup>c</sup> Catalina V. Flores,<sup>a</sup> Leonardo Herrera-Zuñiga,<sup>c</sup> Alejandro Islas-Jácome,<sup>c</sup>

Ricardo A. Peralta<sup>c\*</sup> and Carolina Leyva<sup>a\*</sup>

<sup>a</sup>Instituto Politécnico Nacional, Centro de Investigación en Ciencia Aplicada y Tecnología Avanzada, Laboratorio Nacional de Ciencia, Tecnología y Gestión Integrada del Agua, Legaria 694, Col. Irrigación, Miguel Hidalgo, 11500, CDMX, México

<sup>b</sup>División de Ingeniería en Sistemas Automotrices, Tecnológico de Estudios Superiores del Oriente del Estado de México (TESOEM), Tecnológico Nacional de México, Estado de México 56400, México.

<sup>c</sup>Departamento de Química, División de Ciencias Básicas e Ingeniería. Universidad Autónoma Metropolitana (UAM-I), 09340, México

**Table of contents**

**S1. Experimental details.....S3**  
**S2. Results and Discussions .....S7**  
**S3. References.....S31**

## S1. Experimental details

### Section S1.

#### Materials

Zirconium oxychloride octahydrate ( $ZrOCl_2 \cdot 8H_2O$ ), terephthalic acid (BDC), methanol, ethanol, acetone, N-dimethylformamide (DMF), and bisphenol A (BPA) were some of the chemicals we bought from Sigma Aldrich. All chemicals used in this work are of analytical-grade purity and did not require additional purification.

#### Analytical instruments

To obtain powder X-ray diffraction (PXRD) patterns, a Bruker D2 phaser diffractometer with a Linex eye detector and a Cu-K $\alpha$ 1 radiation anode ( $\lambda = 1.5418 \text{ \AA}$ ) was used. Data were recorded in the  $2-40^\circ$   $2\theta$  range with a step scan of  $0.02^\circ$ . A Shimadzu IRTracer-100 spectrometer and KBr pellets were used to obtain Fourier transform infrared (FT-IR) spectra in the  $4000-500 \text{ cm}^{-1}$  range, which helped identify the unique bands of each material. Nitrogen adsorption-desorption isotherms were measured by a volumetric method using a Micromeritics ASAP 2020 gas sorption analyzer. The sample mass employed was 65.0 mg. Free space correction measurements were performed using ultra-high purity He gas (UHP grade 5, 99.999% pure). Nitrogen isotherms were measured using UHP-grade Nitrogen. All nitrogen analyses were performed using a liquid nitrogen bath at 77 K. Oil-free vacuum pumps were used to prevent contamination of sample or feed gases. UV-Vis diffuse reflectance spectra were used to determine the band gap energies of all materials, following David and Mott's proposed method based on the Kubelka-Munk equation.<sup>1</sup>

Kubelka-Munk function for the Tauc plot graphic.

$$F(R_\infty) = \frac{K}{S} = \frac{(1 - R_\infty)^2}{2R_\infty} \quad (1)$$

$$R_\infty = \frac{R_{sample}}{R_{standard}} \quad (2)$$

$$E_g = h\nu - \frac{(F(R_\infty)h\nu)^\beta}{\beta} \quad (3)$$

Where,

R: reflectance

$\gamma = 2$  for direct allowed transitions

$\beta$ : semiconductor absorption coefficient

$h$ : Planck's constant

$\nu$ : photon's frequency

$E_g$ : band gap energy.

Micrographs were obtained using scanning electron microscopy (SEM) with a JSM-JEOL 7600F microscope to characterize the morphology and size of the prepared samples. X-ray photoelectron spectroscopy (XPS) analyses were conducted using a Thermo Scientific K-alpha X-ray photoelectron spectrometer set to 72 W with a hemispherical analyzer and a monochromator. Survey scans were recorded with a spot size of 400  $\mu\text{m}$  and a fixed pass energy of 200 eV, while high-resolution scans were collected at a pass energy of 20 eV. The spectra were charged and corrected by setting the mainline of the carbon 1s spectrum (adventitious carbon) to 284.8 eV. Spectra analysis was performed using CasaXPS software (version 2.3.14). The Shirley method was used to subtract spectral backgrounds, and the same CasaXPS program carried out curve-fitting procedures and elemental quantifications.

### Photocatalytic tests for Bisphenol A degradation

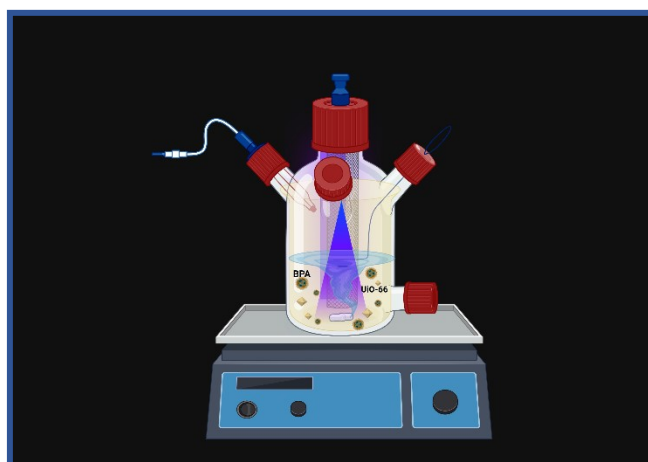

**Figure S1.** Schematic representation of the photocatalytic process.



## Kinetic degradation experiments

| Table S1. Kinetics Models for the BPA Degradation |                                  |                                                                                                                                                                                                                                                                                                 |
|---------------------------------------------------|----------------------------------|-------------------------------------------------------------------------------------------------------------------------------------------------------------------------------------------------------------------------------------------------------------------------------------------------|
| Kinetic model                                     | Equation                         | Parameter                                                                                                                                                                                                                                                                                       |
| PFO model                                         | $C = C_0 e^{-k_{p1}t}$           | <p><math>C</math>: is the concentration of the contaminant at time <math>t</math> (mg·L)</p> <p><math>C_0</math>: Initial concentration of the contaminant. (mg·L)</p> <p><math>k_{p1}</math>: pseudo-first-order rate constant for the kinetic model (mg·L<sup>-1</sup>·min<sup>-1</sup>)</p>  |
| PSO model                                         | $C = \frac{C_0}{1 + k_{p2}tC_0}$ | <p><math>C</math>: is the concentration of the contaminant at time <math>t</math> (mg·L)</p> <p><math>C_0</math>: Initial concentration of the contaminant. (mg·L)</p> <p><math>k_{p2}</math>: pseudo-second-order rate constant for the kinetic model (mg·L<sup>-1</sup>·min<sup>-1</sup>)</p> |

## S2. Results and Discussions

### Synthesis of MOF UiO-66

#### PXRD

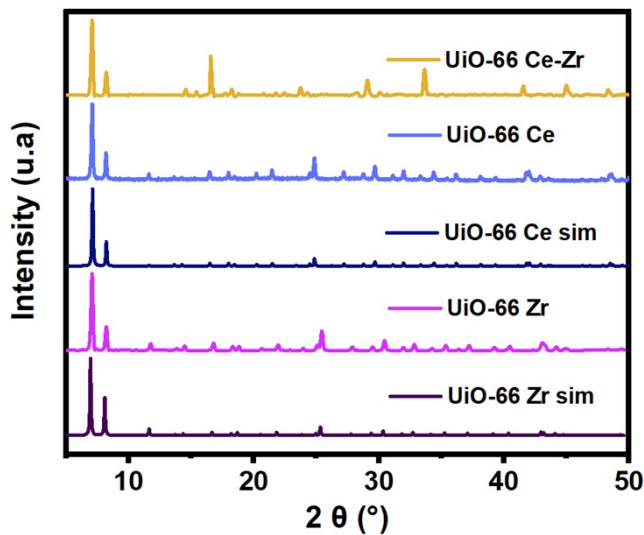

**Figure S3.** PXRD patterns of MOF UiO-66 Zr simulated, MOF UiO-66 Zr as-synthesized, MOF UiO-66 Ce simulated, MOF UiO-66 Ce as-synthesized and MOF UiO-66 Ce-Zr as-synthesized,

#### FT-IR

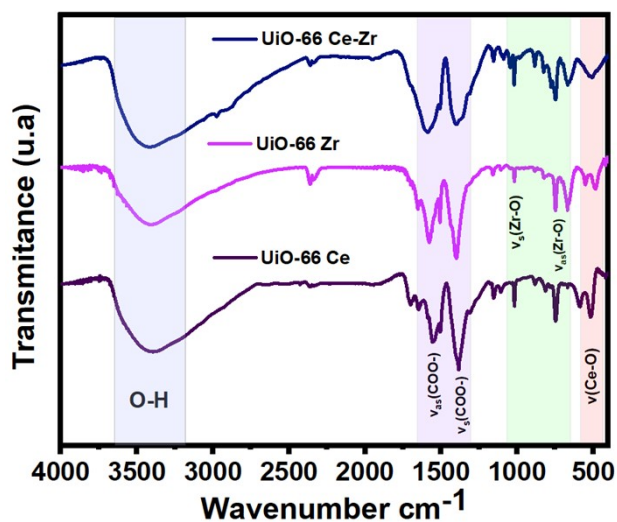

**Figure S4.** FTIR spectra of synthesized MOFs UiO-66 Ce, UiO-66 Zr and UiO-66 Ce-Zr

## SEM-EDS

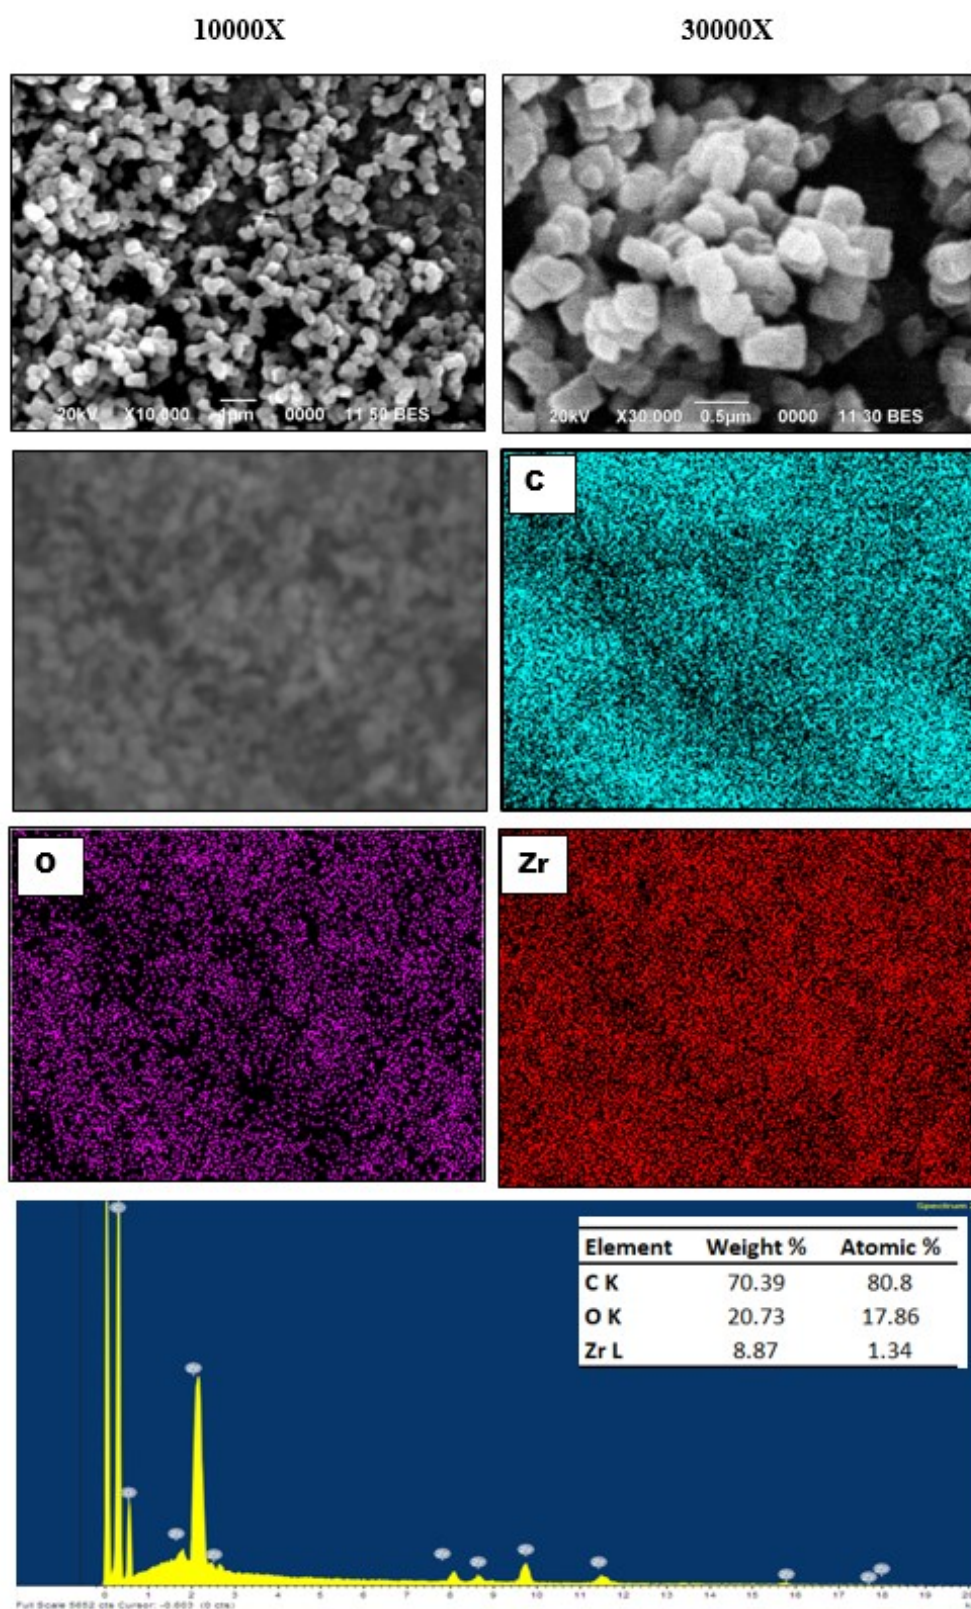

Figure S5. SEM images and SEM-EDS mapping for MOF UiO-66 Zr



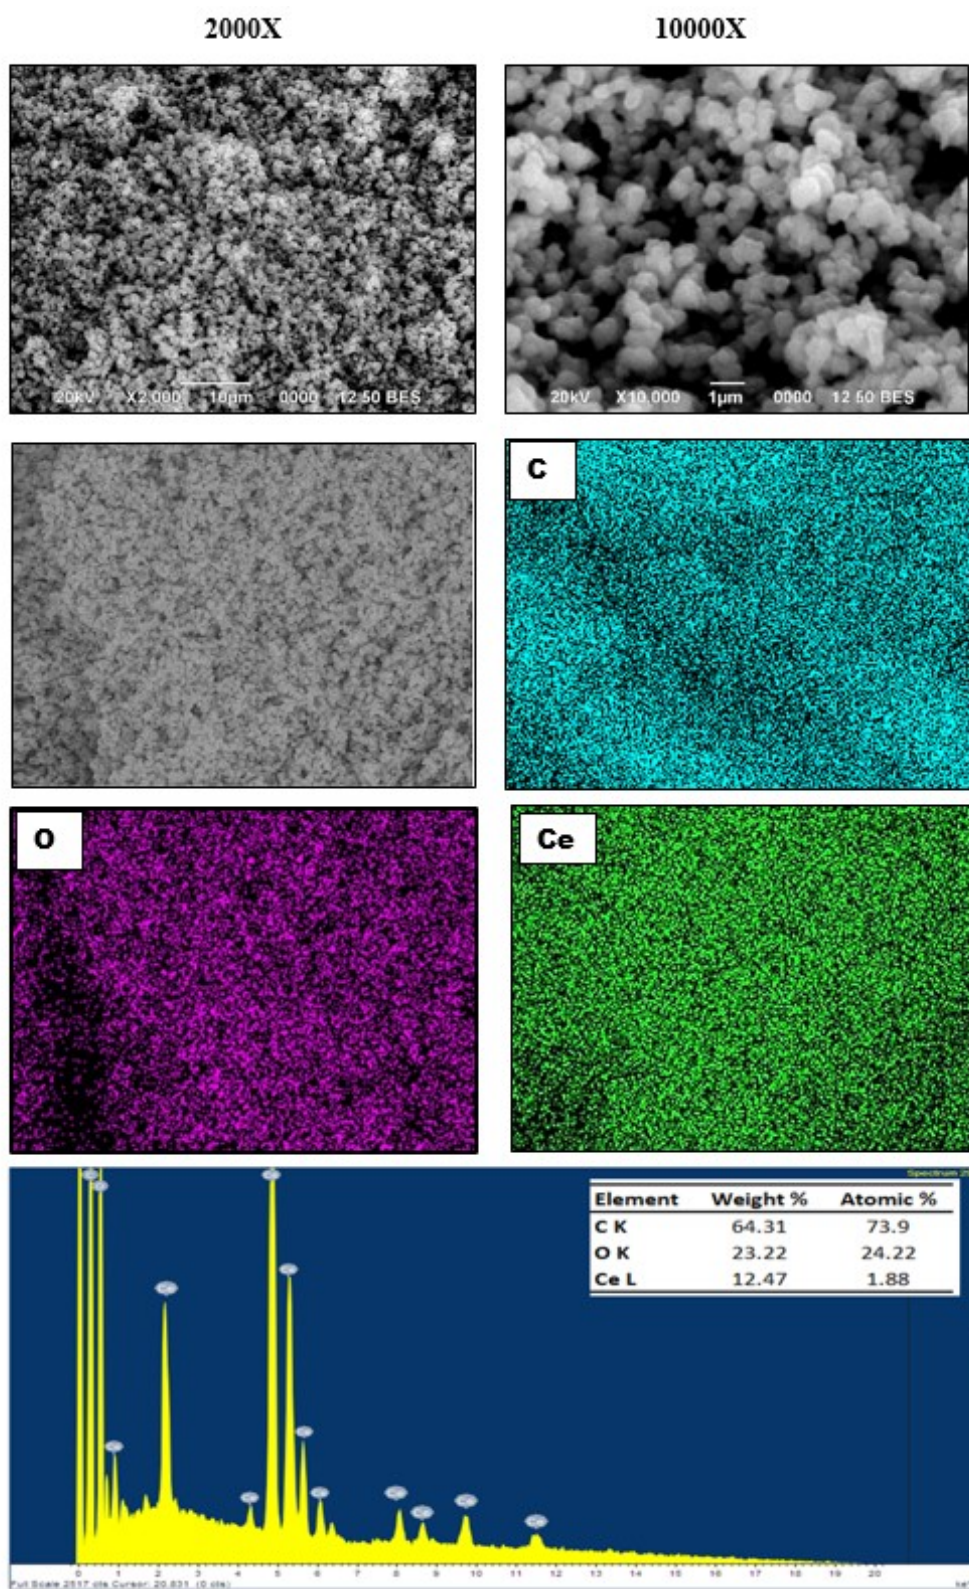

**Figure S6.** SEM images and SEM-EDS mapping for MOF UiO-66 Ce

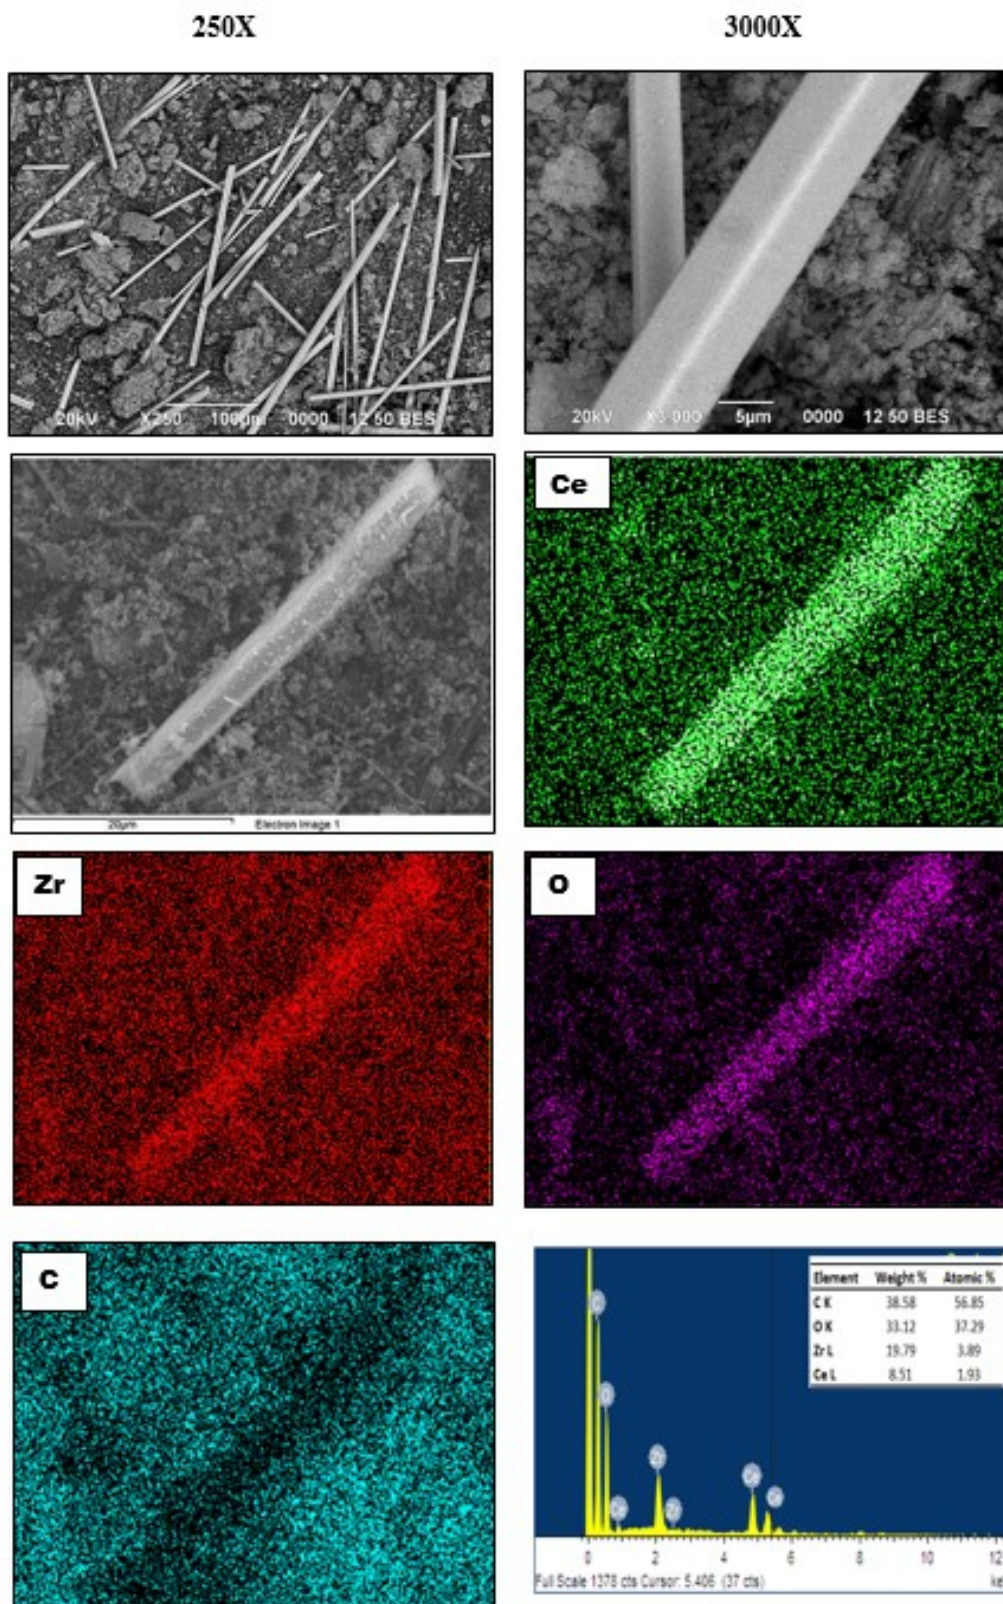

**Figure S7.** SEM images and SEM-EDS mapping for MOF UiO-66 Ce-Zr

## Nitrogen adsorption-desorption

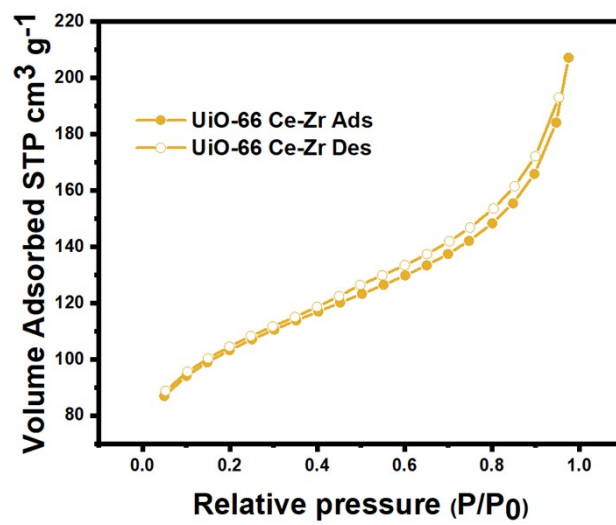

**Figure S8.** Nitrogen isotherm MOF UiO-66 Ce-Zr: adsorption (Ads) and desorption (Des).



# Electrochemical characterization

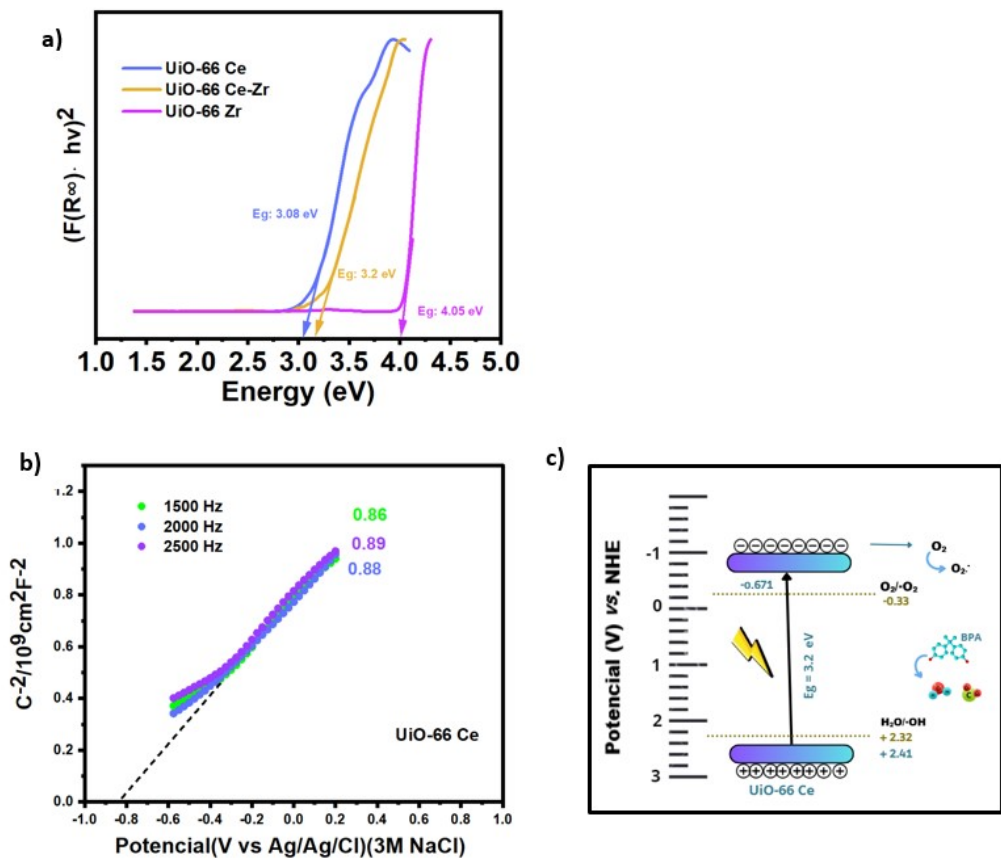

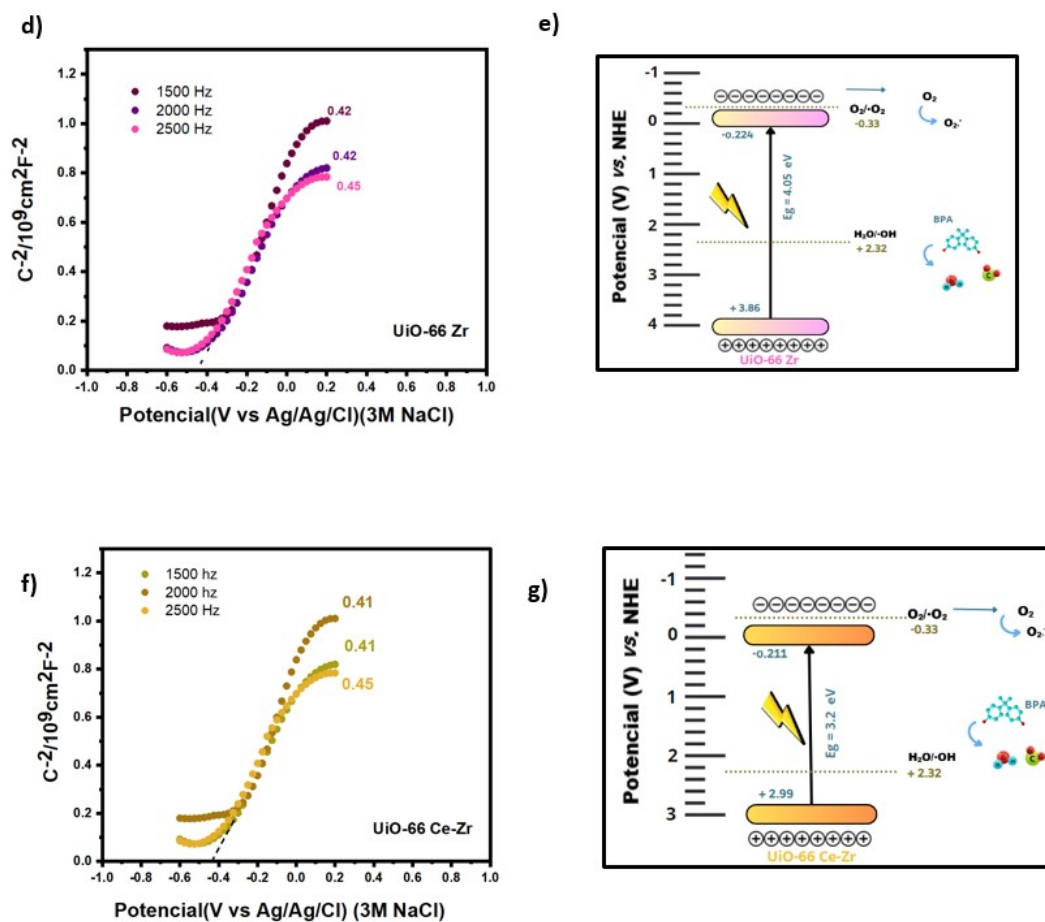

**Figure S9** (a) Tauc plots representation and estimated band-gap ( $E_g$ ) values MOFs UiO-66, (b)-(c) Mott-Schottky curves of prepared at different frequencies (1500, 2000, 2500 Hz) – and electronic band structure of the MOF UiO-66 Ce, (d)-(e) Mott-Schottky curves of prepared at different frequencies (1500, 2000, 2500 Hz) – and electronic band structure of the MOF UiO-66 Zr and (f)-(g) Mott-Schottky curves of prepared at different frequencies (1500, 2000, and 2500 Hz) – and electronic band structure of the MOF UiO-66 Ce-Zr.

## BPA degradation analysis

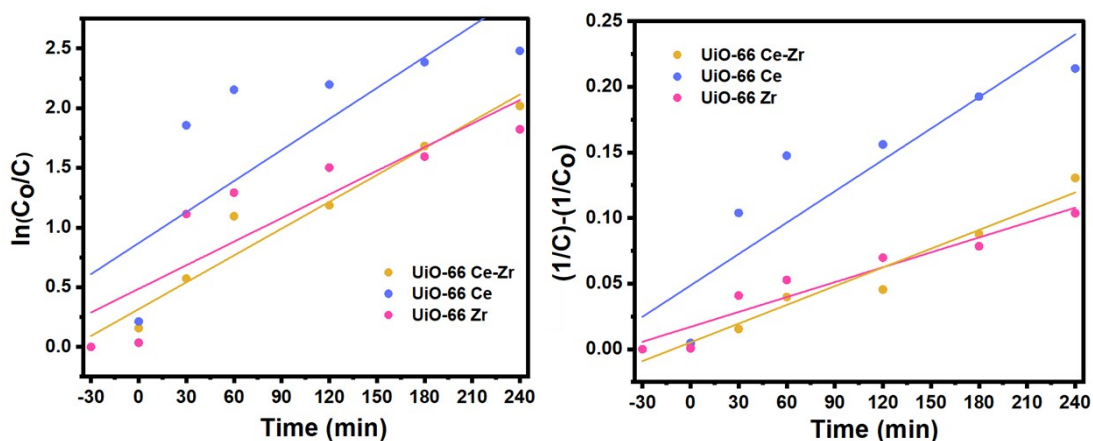

Figure S10. Kinetic studies without and with the lamp of the MOFs UiO-66

| Table S2. Parameters of the kinetic models. |                                               |           |           |              |
|---------------------------------------------|-----------------------------------------------|-----------|-----------|--------------|
| Model                                       | Parameter                                     | Material  |           |              |
|                                             |                                               | UiO-66 Ce | UiO-66 Zr | UiO-66 Ce-Zr |
|                                             | $C_0$<br>( $mg \cdot L$ )                     | 49.7843   | 49.8012   | 49.8012      |
| PFO model                                   | $k_1$<br>( $mg \cdot L^{-1} \cdot min^{-1}$ ) | 0.00866   | 0.00621   | 0.00749      |
|                                             | $R^2$                                         | 0.664     | 0.731     | 0.955        |
| PSO model                                   | $C_0$<br>( $mg \cdot L$ )                     | 49.7843   | 49.8012   | 49.8012      |
|                                             | $k_1$<br>( $mg \cdot L^{-1} \cdot min^{-1}$ ) | 0.000813  | 0.000335  | 0.000476     |
|                                             | $R^2$                                         | 0.84      | 0.92      | 0.960        |

| <b>Table S3. Comparative Table of Different Materials for BPA Degradation</b> |                                 |                            |                                   |                   |
|-------------------------------------------------------------------------------|---------------------------------|----------------------------|-----------------------------------|-------------------|
| <b>Photocatalyst</b>                                                          | <b>BPA concentration (mg/L)</b> | <b>Reaction time (min)</b> | <b>Degradation efficiency (%)</b> | <b>References</b> |
| <b>UiO-66 Ce-Zr</b>                                                           | <b>50</b>                       | <b>240</b>                 | <b>84</b>                         | <b>This work</b>  |
| <b>UiO-66-NH<sub>2</sub></b>                                                  | 5                               | 120                        | 16.2                              | <sup>2</sup>      |
| <b>Bi<sub>2</sub>MoO<sub>6</sub>/MIL-88B(Fe)</b>                              | 20                              | 120                        | 54                                | <sup>3</sup>      |
| <b>Bi<sub>12</sub>O<sub>17</sub>Cl<sub>2</sub>/MIL-100(Fe)</b>                | 20                              | 300                        | 57.4                              | <sup>4</sup>      |
| <b>UiO-66 Zr</b>                                                              | 10                              | 120                        | 66                                | <sup>5</sup>      |
| <b>Mpg-C<sub>3</sub>N<sub>4</sub></b>                                         | 20                              | 180                        | 52.1                              | <sup>6</sup>      |
| <b>2% N,B-TiO<sub>2</sub></b>                                                 | 5                               | 120                        | 79                                | <sup>7</sup>      |
| <b>BiOI/ZIF-8</b>                                                             | 10                              | 180                        | 82.5                              | <sup>8</sup>      |

## Material characterization after BPA degradation

### SEM analysis

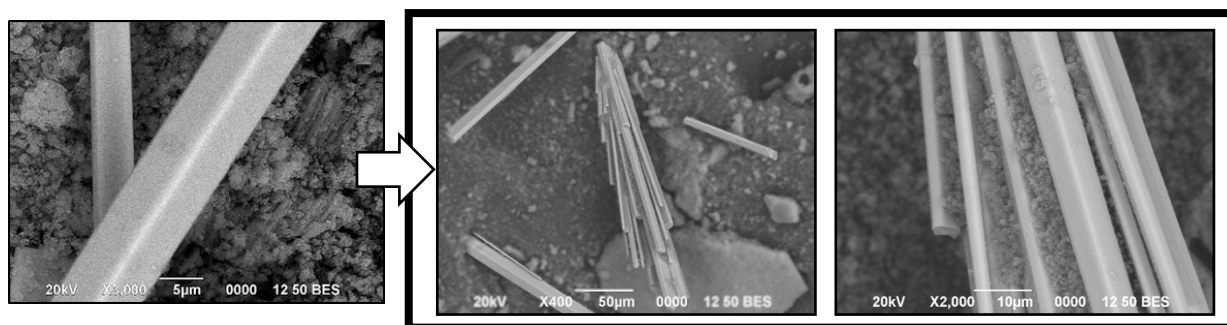

Before

After

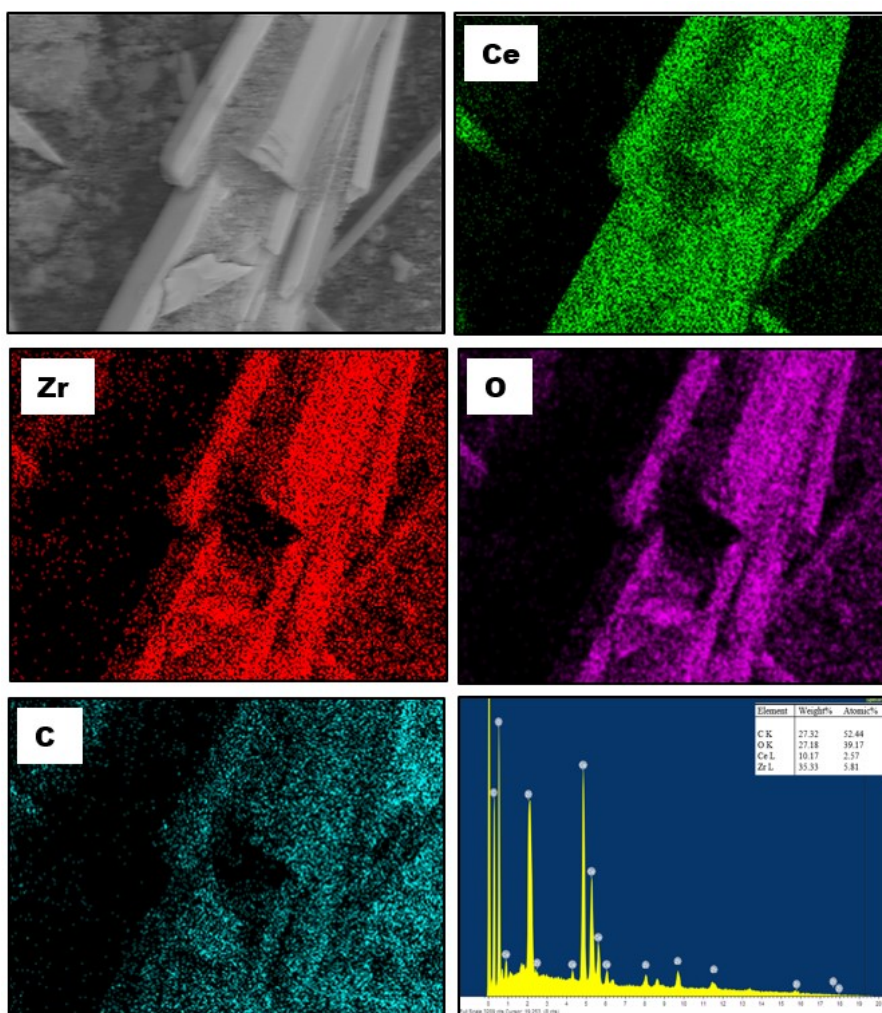

Figure S11. SEM images and SEM MOF UiO-66 Ce-Zr before and after the degradation.



## PXRD analysis

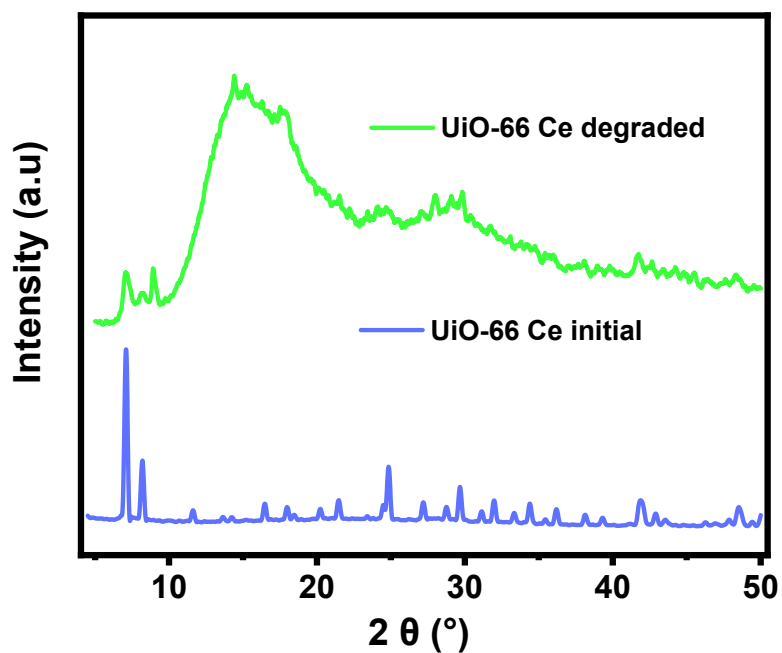

**Figure S12.** PXRD pattern of MOF UiO-66 Ce initial (blue line) and MOF UiO-66 Ce after degradation (green line).

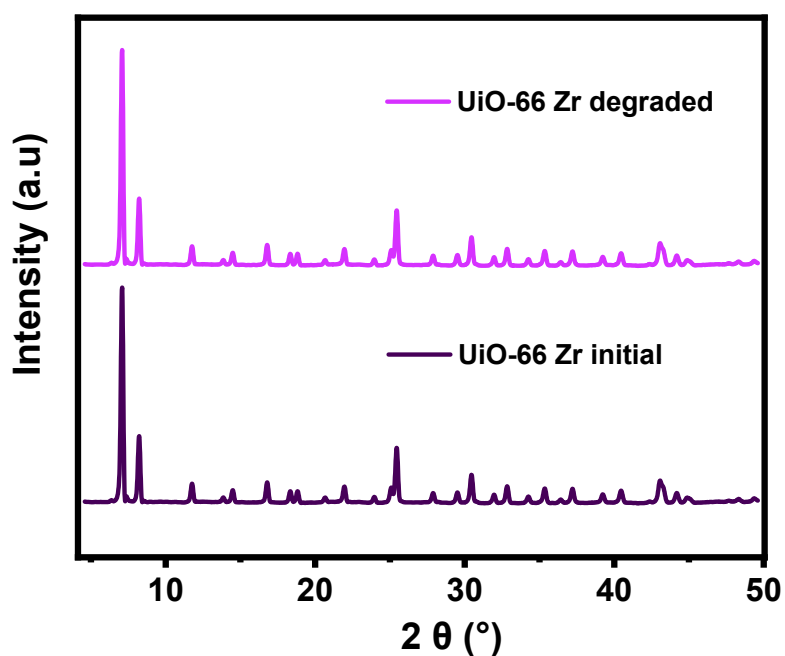

**Figure S13.** PXRD pattern of MOF UiO-66 Zr initial (dark purple line) and MOF UiO-66 Zr after degradation (purple line).

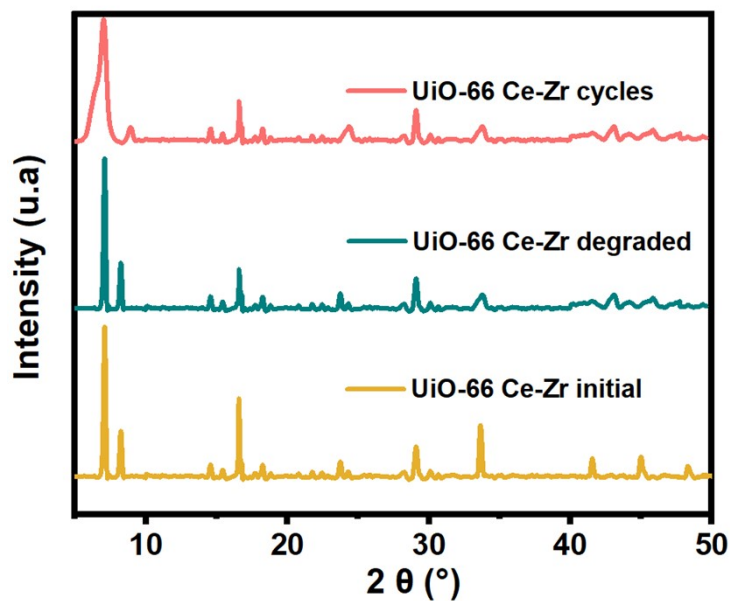

**Figure S14.** PXRD patterns MOF UiO-66 Ce-Zr initial (yellow line), MOF UiO-66 Ce-Zr degraded (green line) and MOF UiO-66 Ce-Zr after three cycles (red line).

#### Nitrogen adsorption-desorption after degradation

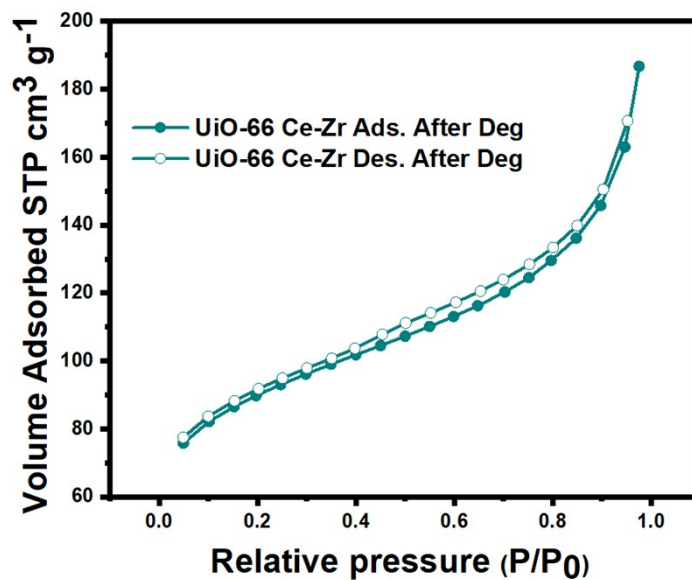

**Figure S15.** Nitrogen isotherm MOF UiO-66 Ce-Zr: adsorption (Ads) and desorption (Des) after the degradation.

## XPS analysis

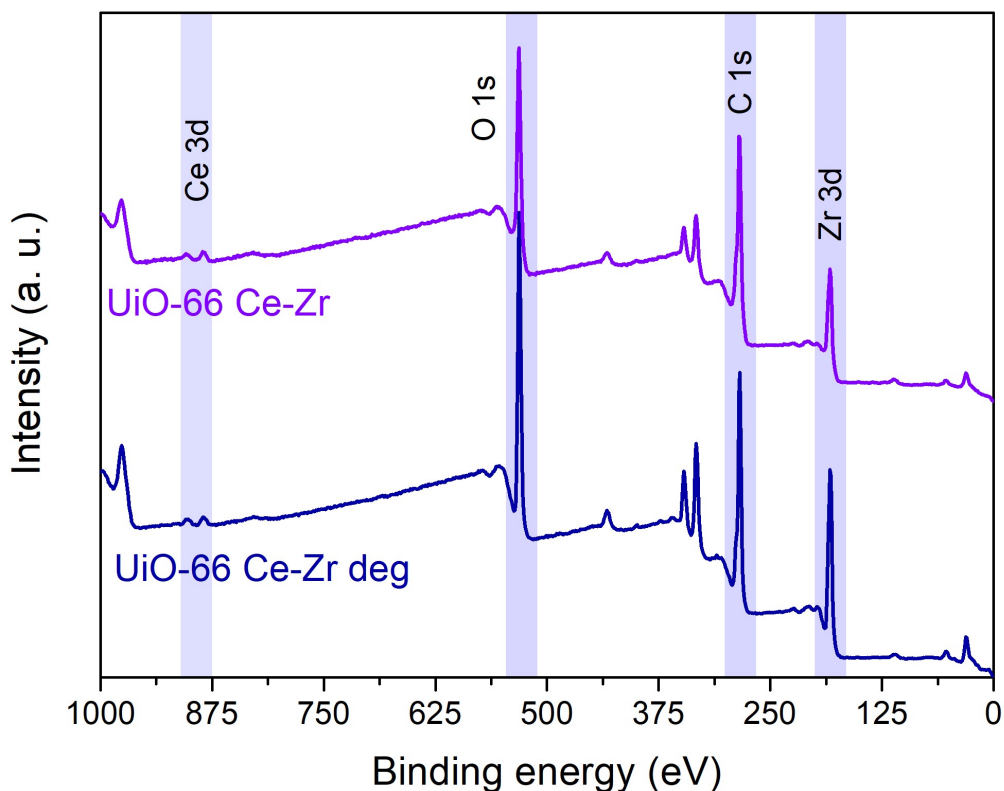

**Figure S16.** Survey spectra of MOF UiO-66 Ce-Zr, before and after the BPA photodegradation.

| Samples          | Elements (At. %) |      |       |       |      |
|------------------|------------------|------|-------|-------|------|
|                  | C 1s             | O 1s | Ce 3d | Zr 3d | N 1s |
| UiO-66 Ce-Zr     | 66.6             | 28.6 | 0.2   | 3.0   | 0.3  |
| UiO-66 Ce-Zr deg | 60.4             | 33.1 | 0.2   | 5.6   | 0.9  |

| Samples      | Assignment                  | E <sub>B</sub> (eV) | FWHM (eV) | At. % |
|--------------|-----------------------------|---------------------|-----------|-------|
| UiO-66 Ce-Zr | C1s <sub>C=C aromatic</sub> | 284.7               | 1.6       | 64.5  |
|              | C1s <sub>C-OH</sub>         | 286.1               | 1.7       | 15.5  |
|              | C1s <sub>O-C=O</sub>        | 288.4               | 1.7       | 16.5  |

|                         |                            |       |     |      |
|-------------------------|----------------------------|-------|-----|------|
|                         | <b>C1s</b> $\pi$ - $\pi^*$ | 289.9 | 1.8 | 3.5  |
| <b>UiO-66 Ce-Zr deg</b> | <b>C1s</b> C=C aromatic    | 284.6 | 1.5 | 64.9 |
|                         | <b>C1s</b> C-OH            | 285.6 | 1.5 | 21.0 |
|                         | <b>C1s</b> O-C=O           | 288.6 | 1.5 | 10.7 |
|                         | <b>C1s</b> $\pi$ - $\pi^*$ | 289.6 | 1.6 | 3.4  |

**Table S6.** The peak-fitting results of O 1s high-resolution signal of UiO-66 Ce-Zr.

| <b>Samples</b>          | <b>Assignment</b>      | <b>E<sub>B</sub> (eV)</b> | <b>FWHM (eV)</b> | <b>At. %</b> |
|-------------------------|------------------------|---------------------------|------------------|--------------|
| <b>UiO-66 Ce-Zr</b>     | <b>O 1s</b> Ce-O, Zr-O | 530.1                     | 1.8              | 14.9         |
|                         | <b>O 1s</b> O-H, C-O   | 531.7                     | 1.9              | 64.0         |
|                         | <b>O 1s</b> C=O        | 533.3                     | 1.9              | 21.1         |
| <b>UiO-66 Ce-Zr deg</b> | <b>O 1s</b> Ce-O, Zr-O | 530.1                     | 1.8              | 19.0         |
|                         | <b>O 1s</b> O-H, C-O   | 531.5                     | 1.9              | 66.2         |
|                         | <b>O 1s</b> C=O        | 532.7                     | 1.9              | 14.8         |

**Table S7.** The peak-fitting results of Ce 3d high-resolution signal of UiO-66 Ce-Zr.

| <b>Samples</b>          | <b>Assignment</b>                            | <b>E<sub>B</sub> (eV)</b> | <b>FWHM (eV)</b> | <b>At. %</b> |
|-------------------------|----------------------------------------------|---------------------------|------------------|--------------|
| <b>UiO-66 Ce-Zr</b>     | <b>Ce 3d<sub>5/2</sub></b> (v <sup>0</sup> ) | 882.5                     | 4.0              | 19.5         |
|                         | <b>Ce 3d<sub>5/2</sub></b> (v <sup>1</sup> ) | 886.1                     | 4.0              | 40.3         |
|                         | <b>Ce 3d<sub>3/2</sub></b> (u <sup>0</sup> ) | 901.0                     | 4.0              | 12.8         |
|                         | <b>Ce 3d<sub>3/2</sub></b> (u <sup>1</sup> ) | 904.7                     | 4.0              | 27.4         |
| <b>UiO-66 Ce-Zr deg</b> | <b>Ce 3d<sub>5/2</sub></b> (v <sup>0</sup> ) | 882.2                     | 3.5              | 24.7         |
|                         | <b>Ce 3d<sub>5/2</sub></b> (v <sup>1</sup> ) | 885.8                     | 3.5              | 35.9         |
|                         | <b>Ce 3d<sub>3/2</sub></b> (u <sup>0</sup> ) | 900.7                     | 3.5              | 15.8         |
|                         | <b>Ce 3d<sub>3/2</sub></b> (u <sup>1</sup> ) | 904.4                     | 3.5              | 23.6         |

**Table S8.** The peak-fitting results of Zr 3p high-resolution signal of UiO-66 Ce-Zr.

| <b>Samples</b>      | <b>Assignment</b>          | <b>E<sub>B</sub> (eV)</b> | <b>FWHM (eV)</b> | <b>At. %</b> |
|---------------------|----------------------------|---------------------------|------------------|--------------|
| <b>UiO-66 Ce-Zr</b> | <b>Zr 3d<sub>5/2</sub></b> | 182.6                     | 1.9              | 51.6         |
|                     | <b>Zr 3d<sub>3/2</sub></b> | 184.9                     | 1.9              | 48.4         |

|                  |                      |       |     |      |
|------------------|----------------------|-------|-----|------|
| UiO-66 Ce-Zr deg | Zr 3d <sub>5/2</sub> | 182.5 | 1.9 | 61.4 |
|                  | Zr 3d <sub>3/2</sub> | 184.8 | 1.9 | 38.6 |

### DFT and docking simulations results analysis

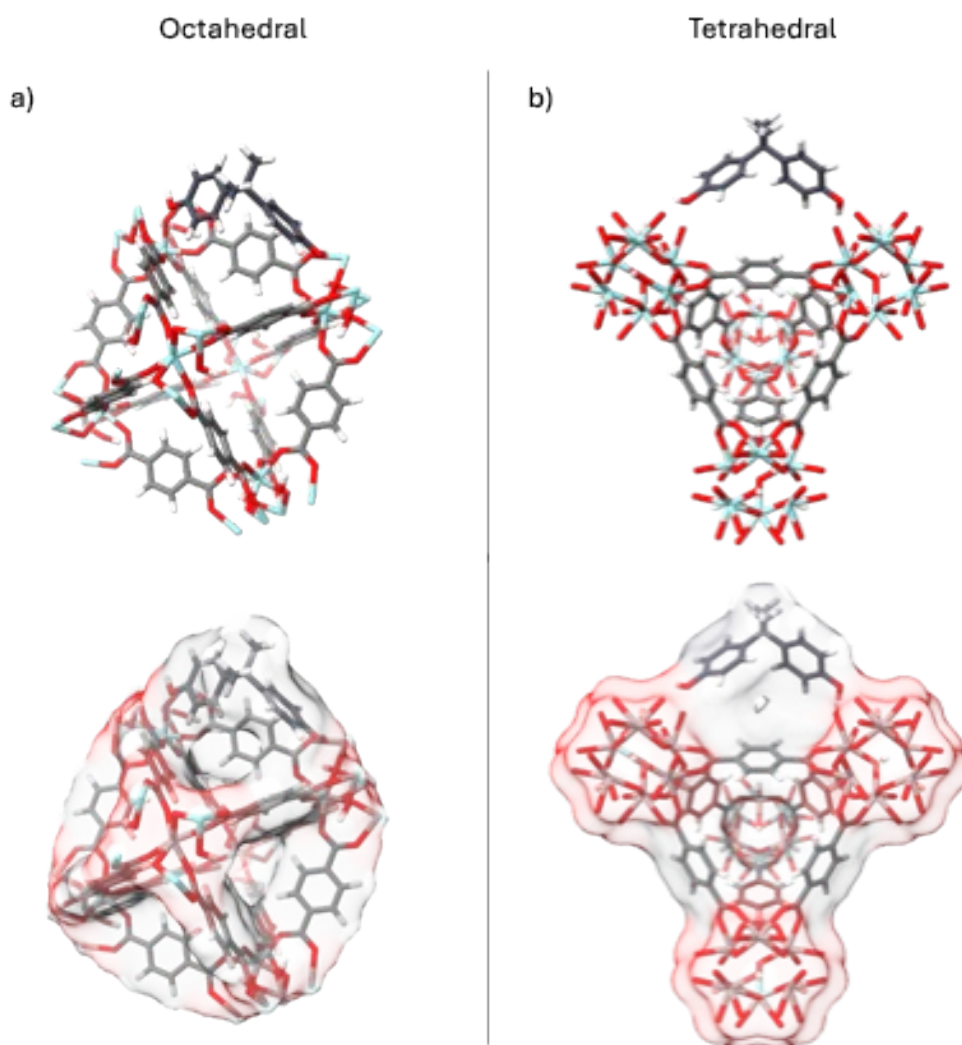

**Figure S17.** Structural representation of MOF/BPA interactions. (a) Proposed interaction between BPA and UiO-66 in octahedral pore. (b) Proposed interaction between BPA and UiO-66 in tetrahedral pore.

**Table S9.** Total parameters of volumes calculated with VolMol.

| Total Volumes calculated ( $\text{\AA}^3$ )  |          |          |
|----------------------------------------------|----------|----------|
|                                              | UiO-66   | BPA      |
| Van der Waals volume                         | 2939.96  | 207.184  |
| Probe excluded void volume                   | 488.056  | 13.752   |
| Molecular volume (vdw + probe excluded void) | 3428.016 | 220.936  |
| Molecular volume with isolated cavities      | 3441.32  | 220.936  |
| Small probe core volume                      | 11.304   | 0        |
| Small probe shell volume                     | 146.648  | 0        |
| Small probe occupied volume (core + shell)   | 157.952  | 0        |
| Large probe shell volume                     | 7560.68  | 1323.584 |

**Table S10.** Energies reported by DFT study and calculation of binding energy.

| Octahedral Pore  |           |            |   |           |                          |
|------------------|-----------|------------|---|-----------|--------------------------|
| $E_i$            | UiO-66    | BPA        | → | Adduct    | $\Delta E_i$<br>kcal/mol |
| SCF              | -24059745 | -458721.84 |   | -24595311 | -76843.426               |
| Tetrahedral Pore |           |            |   |           |                          |
| $E_i$            | UiO-66    | BPA        | → | Adduct    | $\Delta E_i$<br>kcal/mol |
| SCF              | -21792178 | -458721.84 |   | -22213412 | 37487.5007               |

**Table S11.** Total parameters of surface areas calculated with VolMol.

| Total Surface Areas calculated ( $\text{\AA}^2$ )                |            |            |
|------------------------------------------------------------------|------------|------------|
|                                                                  | UiO-66     | BPA        |
| Van der Waals surface                                            | 2437.75147 | 232.359856 |
| Small probe excluded surface                                     | 427.731376 | 0          |
| Small probe accessible surface (similar to Lee-Richards surface) | 69.34754   | 0          |
| Molecular surface (both probes excluded surface)                 | 2169.72376 | 220.33068  |

**Table S12.** Cavities data calculated with VolMol for UiO-66.

| Cavity | Occupied Volume (Å <sup>3</sup> ) | Accessible Volume (Å <sup>3</sup> ) | Excluded Surface (Å <sup>2</sup> ) | Accessible Surface (Å <sup>2</sup> ) | Cavity Type | Cavity Center Coordinates (Å) |      |      |
|--------|-----------------------------------|-------------------------------------|------------------------------------|--------------------------------------|-------------|-------------------------------|------|------|
|        |                                   |                                     |                                    |                                      |             | x                             | y    | z    |
| 1      | 21.664                            | 1.888                               | 58.7557                            | 11.348                               | Pocket      | 14.5                          | 3.8  | 7.2  |
| 2      | 20.624                            | 1.888                               | 56.9695                            | 10.8711                              | Pocket      | 10.8                          | 10.4 | 7.2  |
| 3      | 19.784                            | 1.896                               | 54.6997                            | 10.7459                              | Pocket      | 18.2                          | 10.4 | 7.3  |
| 4      | 17.376                            | 1.2                                 | 53.1163                            | 8.67669                              | Pocket      | 14.5                          | 8.1  | 1.2  |
| 5      | 17.216                            | 1.136                               | 44.1072                            | 6.62316                              | Tunnel      | 14.5                          | 8.6  | 10.7 |
| 6      | 16.328                            | 1.104                               | 42.7537                            | 6.80827                              | Tunnel      | 14.5                          | 12.9 | 4.6  |
| 7      | 15.888                            | 1.08                                | 41.4249                            | 6.7227                               | Tunnel      | 18.4                          | 6.2  | 4.4  |
| 8      | 15.768                            | 1.088                               | 41.3877                            | 6.94111                              | Tunnel      | 10.6                          | 6.2  | 4.4  |
| 9      | 4.544                             | 0.008                               | 15.1648                            | 0.2035                               | Isolated    | 17.4                          | 12.9 | 9.1  |
| 10     | 4.536                             | 0.008                               | 15.1648                            | 0.2035                               | Isolated    | 11.6                          | 12.9 | 9.1  |
| 11     | 4.224                             | 0.008                               | 15.0069                            | 0.2035                               | Isolated    | 20                            | 8.8  | 9.1  |

## By-products analysis by UPLC-MS

Table S13. By-products analysis with diferen m/z.

| <i>Compound</i>                                              | <i>Molecular Structure</i>                                                          | <i>Molecular formula</i>                         | <i>Molecular Mass (M)<sup>a</sup> (g/mol)</i> | <i>(M-H)<sup>+</sup> (m/z)</i> | <i>t<sub>R</sub> (min)</i> | <i>Ref.</i> |
|--------------------------------------------------------------|-------------------------------------------------------------------------------------|--------------------------------------------------|-----------------------------------------------|--------------------------------|----------------------------|-------------|
| <b>BPA</b>                                                   | 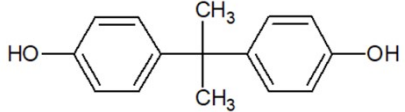   | <b>C<sub>15</sub>H<sub>16</sub>O<sub>2</sub></b> | <b>228.29</b>                                 | <b>227.29</b>                  | <b>6.02<br/>6.67</b>       | 9           |
| <b>5-[2-(4-hydroxyphenyl)propan-2-yl]benzene-1,2,3-triol</b> |    | <b>C<sub>15</sub>H<sub>16</sub>O<sub>4</sub></b> | <b>260.29</b>                                 | <b>259.3</b>                   | <b>6.67</b>                |             |
| <b>phenol</b>                                                |   | <b>C<sub>6</sub>H<sub>6</sub>O</b>               | <b>94.1</b>                                   | <b>93.2</b>                    | <b>0.845</b>               |             |
| <b>benzene-1,2,3,5-tetrol</b>                                |  | <b>C<sub>6</sub>H<sub>6</sub>O<sub>4</sub></b>   | <b>142.1</b>                                  | <b>141.1</b>                   | <b>0.845</b>               |             |



|                                                                   |                                                                                    |                                                 |               |               |                                |    |
|-------------------------------------------------------------------|------------------------------------------------------------------------------------|-------------------------------------------------|---------------|---------------|--------------------------------|----|
| <b>2,3-dihydroxy-5-(propan-2-yl)cyclohexa-2,5-diene-1,4-dione</b> | 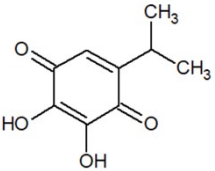  | <b>C<sub>9</sub>H<sub>10</sub>O<sub>4</sub></b> | <b>182.1</b>  | <b>181.1</b>  | <b>0.845<br/>6.02<br/>6.67</b> |    |
| <b>(2Z)-but-2-enedioic acid</b>                                   |   | <b>C<sub>4</sub>H<sub>4</sub>O<sub>4</sub></b>  | <b>116.05</b> | <b>115.01</b> | <b>0.530</b>                   |    |
| <b>4-(prop-1-en-2-yl)phenol</b>                                   |   | <b>C<sub>9</sub>H<sub>10</sub>O</b>             | <b>134.17</b> | <b>133</b>    | <b>6.02<br/>6.67</b>           | 10 |
| <b>3,5-di-tert-butylphenol</b>                                    |  | <b>C<sub>14</sub>H<sub>22</sub>O</b>            | <b>206.32</b> | <b>205.12</b> | <b>0.845<br/>6.02<br/>6.67</b> | 11 |

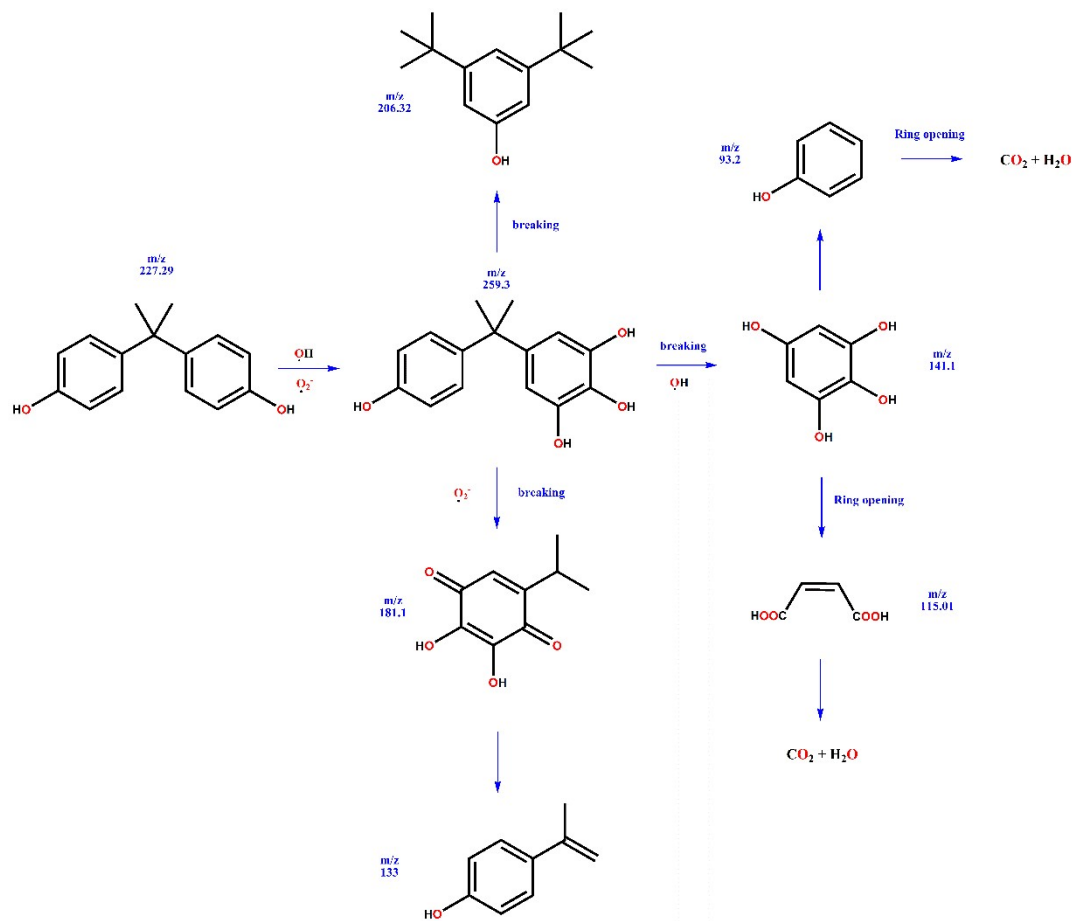

**Figure S18.** Reaction pathway for the photocatalytic degradation of bisphenol A with UiO-66 Ce-Zr illuminated with UV light.

## Toxicology in-silico study of degradation products

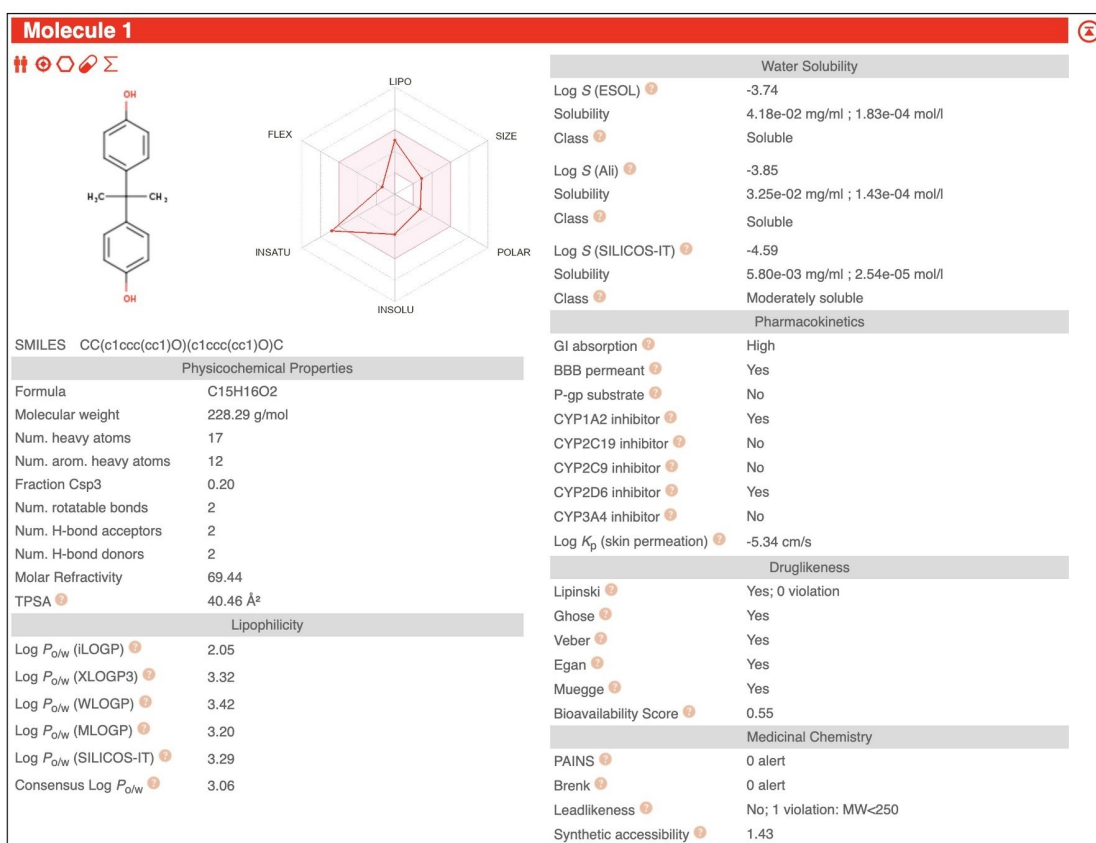

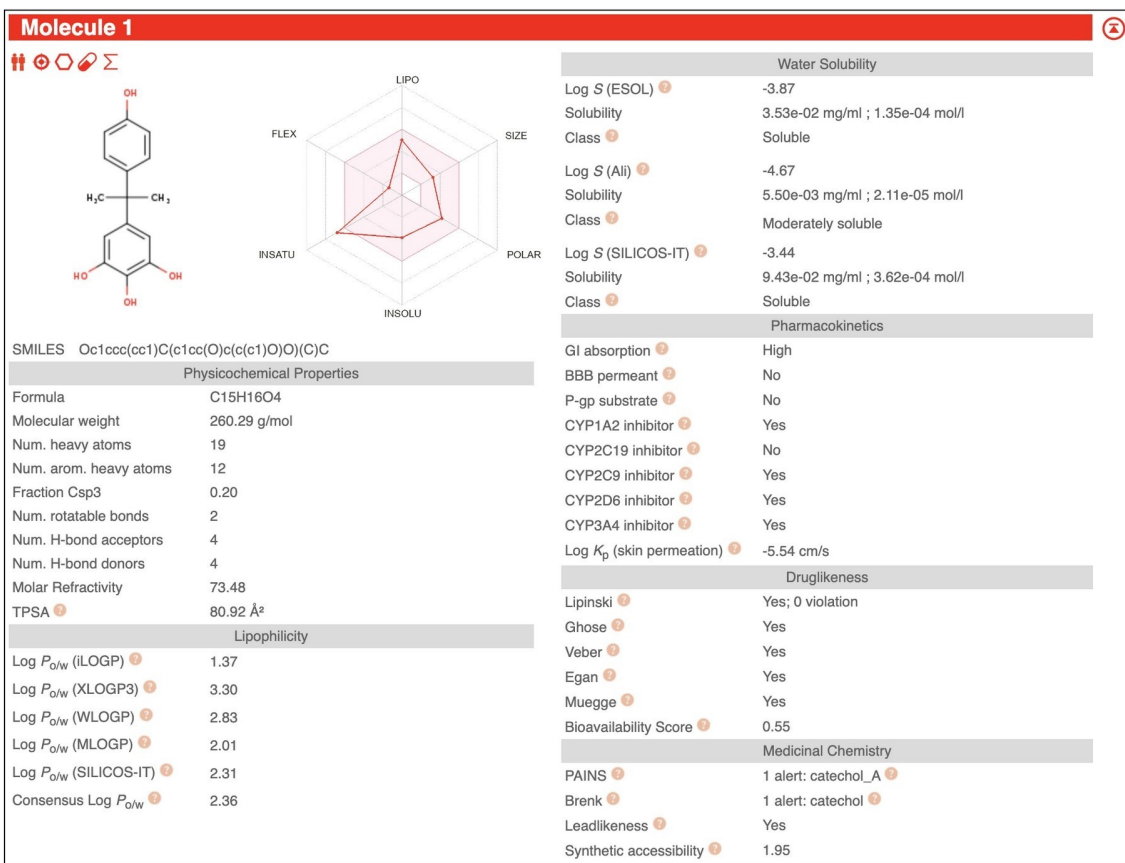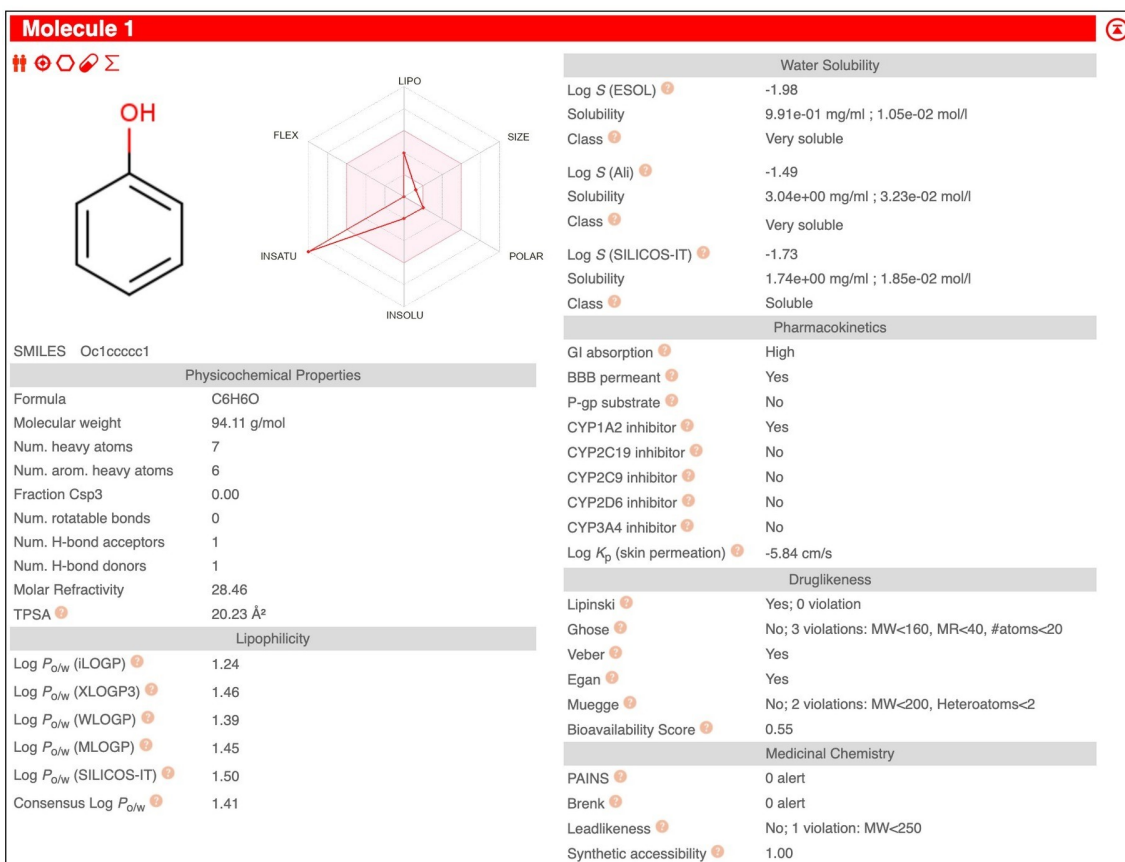

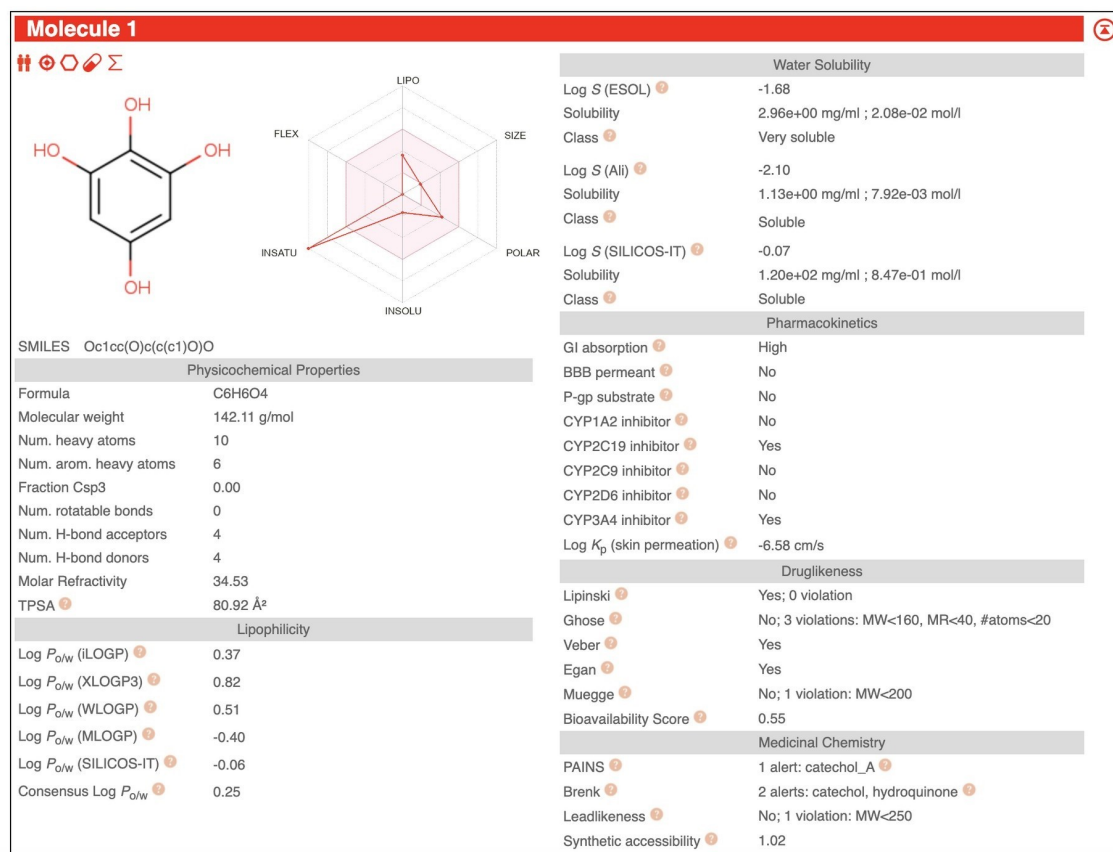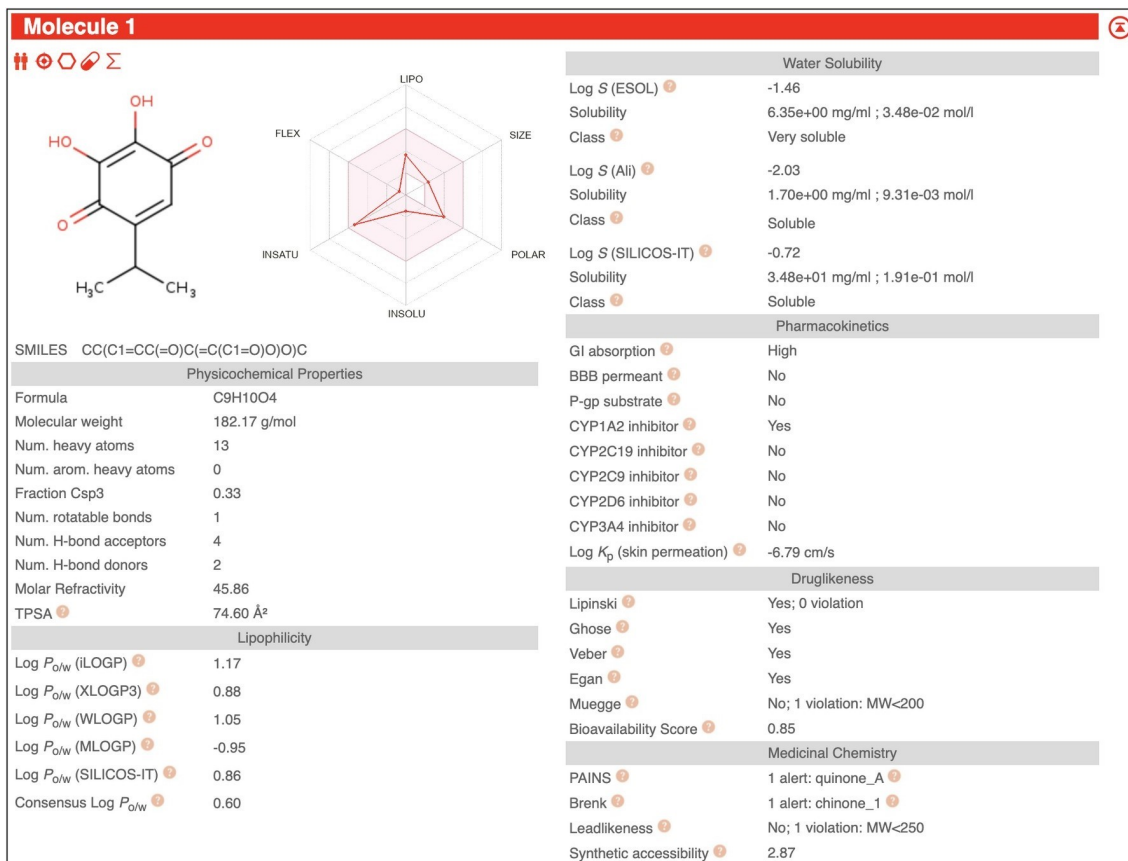

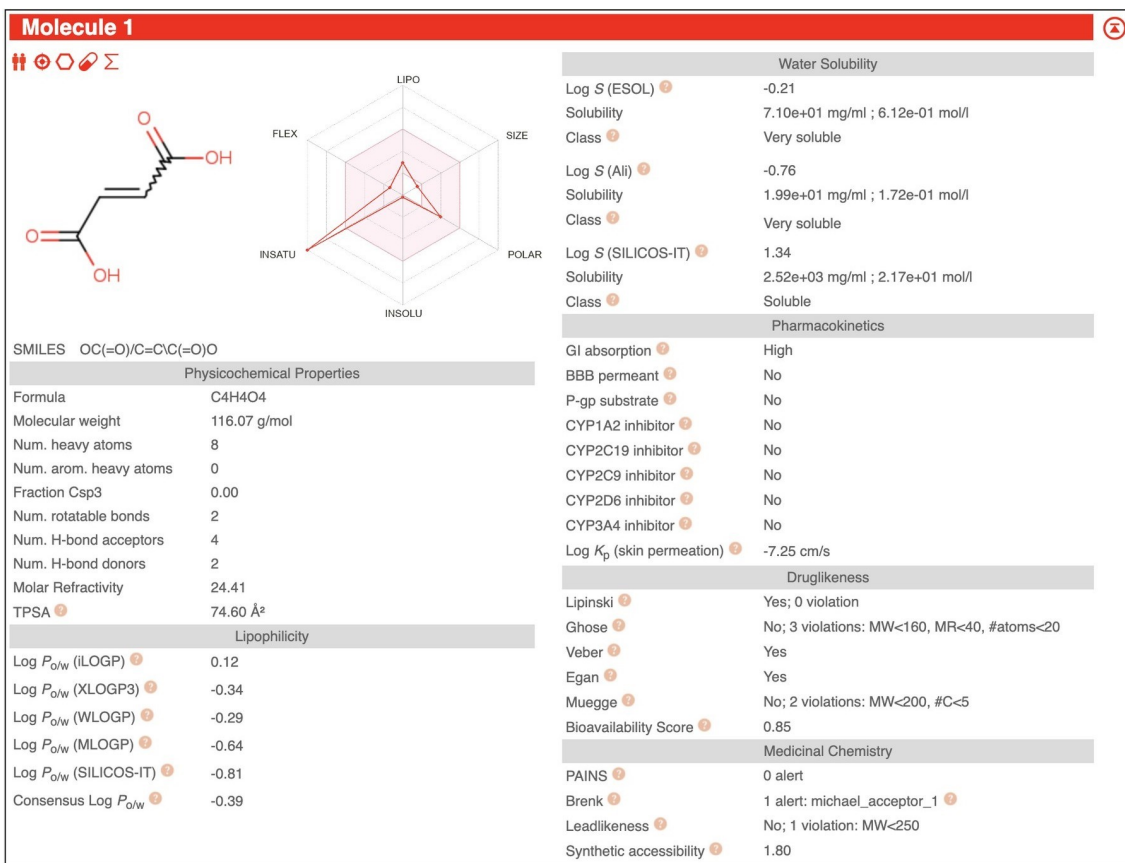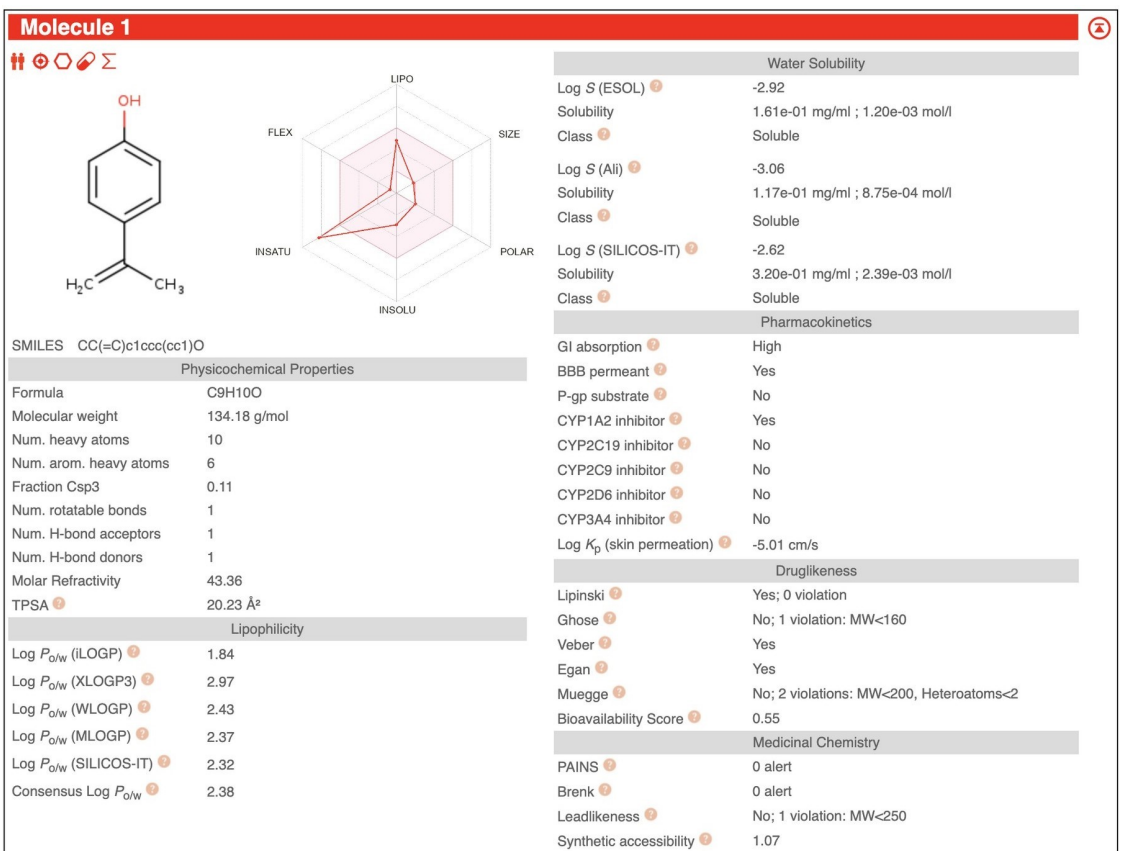

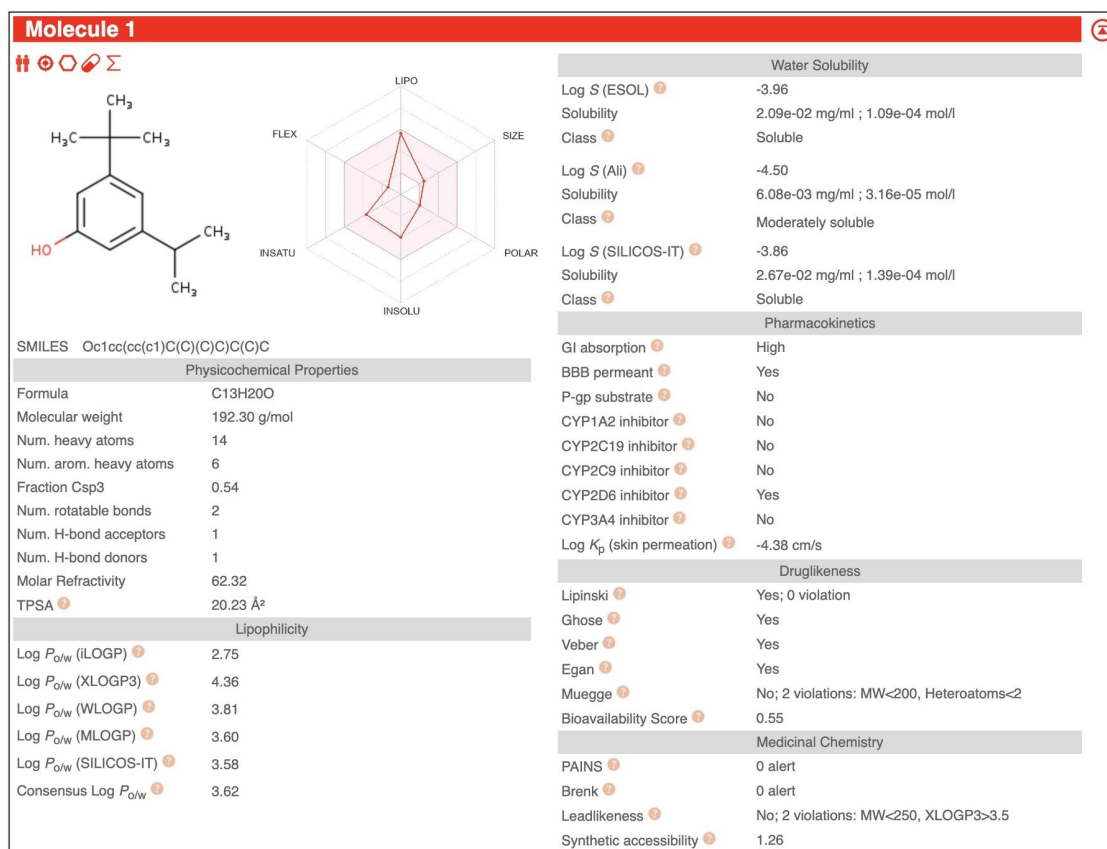

### S3. References

- 1 P. H. M. Andrade, C. Volkringer, T. Loiseau, A. Tejada, M. Hureau and A. Moissette, *Applied Materials Today*, 2024, **37**, 102094.
- 2 Y.-X. Li, X. Wang, C.-C. Wang, H. Fu, Y. Liu, P. Wang and C. Zhao, *Journal of Hazardous Materials*, 2020, **399**, 123085.
- 3 K. Zhao, Z. Zhang, Y. Feng, S. Lin, H. Li and X. Gao, *Applied Catalysis B: Environmental*, 2020, **268**, 118740.
- 4 C. Zhao, J. Wang, X. Chen, Z. Wang, H. Ji, L. Chen, W. Liu and C.-C. Wang, *Science of The Total Environment*, 2021, **752**, 141901.
- 5 S. Feng, R. Wang, S. Feng, Z. Zhang and L. Mao, *Res Chem Intermed*, 2019, **45**, 1263–1279.
- 6 C. Chang, Y. Fu, M. Hu, C. Wang, G. Shan and L. Zhu, *Applied Catalysis B: Environmental*, 2013, **142–143**, 553–560.
- 7 W. H. M. Abdelraheem, M. K. Patil, M. N. Nadagouda and D. D. Dionysiou, *Applied Catalysis B: Environmental*, 2019, **241**, 598–611.
- 8 W. Zheng, S. Feng, C. Shao, G. Zhu, Z. Ni, J. Sun and X. Huang, *Res Chem Intermed*, 2020, **46**, 2951–2967.
- 9 J. C. C. Da Silva, J. A. Reis Teodoro, R. J. D. C. F. Afonso, S. F. Aquino and R. Augusti, *Rapid Comm Mass Spectrometry*, 2014, **28**, 987–994.
- 10 Y. Wang, K. Hu, Z. Yang, C. Ye, X. Li and K. Yan, *Front. Bioeng. Biotechnol.*, 2021, **8**, 616780.
- 11 X. Li, Z. Wang, B. Zhang, A. I. Rykov, M. A. Ahmed and J. Wang, *Applied Catalysis B: Environmental*, 2016, **181**, 788–799.
